# Supplementary material
Source: PubMed Central journal article supplement (PMC3844554)
Supplement: NIHMS525239-supplement-01.pdf [file NIHMS525239-supplement-01.pdf]

**Table S1. Common Risk Variants Enriched within the Loci Indicated by the Mendelian Code, Related to Figures 2 and 3A**

| Disease                     | Mendelian Genes                         | Comorbid Mendelian Genes                                                                                                                                                                 |
|-----------------------------|-----------------------------------------|------------------------------------------------------------------------------------------------------------------------------------------------------------------------------------------|
| Asthma                      | SLC22A5; CRB1                           | SLC22A5 (Systemic Primary Carnitine Deficiency); CRB1 (Retinitis Pigmentosa)                                                                                                             |
| Malignant Brain Neoplasm    | TERT                                    | TERT (Inherited Anomalies of the Skin)                                                                                                                                                   |
| Psoriasis                   | TSC1                                    |                                                                                                                                                                                          |
| Diabetes Mellitus Type 1    | IL7R                                    | IL7R (Severe Combined Immunodeficiency)                                                                                                                                                  |
| Melanoma                    | ATM; TYR; SLC45A2                       | TYR (Disorders of Aromatic Amino Acid Metabolism); SLC45A2 (Disorders of Aromatic Amino Acid Metabolism)                                                                                 |
| Psoriasis                   | TSC1                                    |                                                                                                                                                                                          |
| Bipolar Disorder            | SYNE1; CACNA1C; CTNND2; PRPF3; PPP2R2B  | SYNE1 (Spinocerebellar Ataxia); CACNA1C (Long QT Syndrome); PRPF3 (Retinitis Pigmentosa); PPP2R2B (Spinocerebellar Ataxia)                                                               |
| Breast Cancer               | COL1A1; FGFR2; TERT; FBN1               | TERT (Inherited Anomalies of the Skin)                                                                                                                                                   |
| Schizophrenia               | SYNE1; CACNA1C; CTNND2; PRPF3; PPP2R2B  | SYNE1 (Spinocerebellar Ataxia); PRPF3 (Retinitis Pigmentosa); CACNA1C (Long QT Syndrome); PPP2R2B (Spinocerebellar Ataxia)                                                               |
| Lung Cancer                 | TP63; TERT; ERCC2                       | TERT (Inherited Anomalies of the Skin)                                                                                                                                                   |
| Acute Myocardial Infarction | LAMC2; ABCA1; DNM2                      | ABCA1 (Lipoprotein Deficiencies); DNM2 (Hereditary Sensory Neuropathy; Hereditary Muscular Dystrophy)                                                                                    |
| Prostate Cancer             | PKHD1; EVC; TERT; ITGA6                 | PKHD1 (Polycystic Kidney, Autosomal Dominant); TERT (Inherited Anomalies of the Skin)                                                                                                    |
| Gastric Cancer              | CHEK2                                   | CHEK2 (Li-Fraumeni and Related Syndromes)                                                                                                                                                |
| Diabetes Mellitus Type 2    | ABCA1; LPL; APOB; NOTCH2; KCNQ1; ABCB11 | ABCB11 (Other Specified Disorders of Amino Acid Metabolism); LPL (Lipoprotein Deficiencies); APOB (Lipoprotein Deficiencies); KCNQ1 (Long QT Syndrome); ABCA1 (Lipoprotein Deficiencies) |
| Lupus                       | LAMC2; ETS1; TNXB                       |                                                                                                                                                                                          |
| Cerebral Infarction         | HDAC9; ADAMTS2                          | ADAMTS2 (Congenital Hydrocephalus)                                                                                                                                                       |
| Rheumatoid Arthritis        | GCH1; ATXN2; AIRE                       | GCH1 (Dopa-Responsive Dystonia);                                                                                                                                                         |

|                                 |                                |                                                                                                                            |
|---------------------------------|--------------------------------|----------------------------------------------------------------------------------------------------------------------------|
|                                 |                                | ATXN2 (Spinocerebellar Ataxia); AIRE (Autoimmune Polyglandular Syndrome)                                                   |
| Parkinsonism                    | CYP17A1                        |                                                                                                                            |
| Lymphosarcoma, Reticularsarcoma | POLR1D                         |                                                                                                                            |
| Celiac Disease                  | ETS1; ATXN2                    | ATXN2 (Spinocerebellar Ataxia)                                                                                             |
| Alzheimer's Disease             | STK11; BIN1                    |                                                                                                                            |
| Gout                            | FGFR2                          |                                                                                                                            |
| Autism                          | SYNE1; PRPF3; CACNA1C; PPP2R2B | SYNE1 (Spinocerebellar Ataxia); PRPF3 (Retinitis Pigmentosa); CACNA1C (Long QT Syndrome); PPP2R2B (Spinocerebellar Ataxia) |
| Depression                      | SYNE1; PRPF3; CACNA1C; PPP2R2B | SYNE1 (Spinocerebellar Ataxia); PRPF3 (Retinitis Pigmentosa); CACNA1C (Long QT Syndrome); PPP2R2B (Spinocerebellar Ataxia) |

This table provides the common risk variants that lie within the Mendelian disease genes included in this study (second column). Those genes that were also indicated by the complex-Mendelian comorbidity analysis (along with their corresponding diseases) are provided in the final column.
